# Supplementary material for: A systematic review of non-pharmacological interventions used for pain relief after orthopedic surgical procedures
Source: PubMed Central journal article supplement (PMC7480131; doi:10.3892/etm.2020.9163), 2020-09-01
Supplement: Supplementary_Data.pdf [file Supplementary_Data.pdf]

Table SI. Search strategy.

| Search ID | Features/search terms                                                                                                                                                                                                                                                                           |
|-----------|-------------------------------------------------------------------------------------------------------------------------------------------------------------------------------------------------------------------------------------------------------------------------------------------------|
| 1         | exp Orthopedics/                                                                                                                                                                                                                                                                                |
| 2         | 'wounds and injuries'/ or arm injuries/ or athletic injuries/ or crush injuries/ or joint dislocations/or fractures, bone/ or hand injuries/ or hip injuries/ or leg injuries/ or neck injuries/ or shoulder injuries/ or spinal cord injuries/ or 'sprains and strains'/ or thoracic injuries/ |
| 3         | fracture.mp. or exp Fracture Fixation, Intramedullary/ or exp Fracture Fixation, Internal/ or exp Open Fracture Reduction/ or exp Fracture Fixation/ or exp Fracture Healing/                                                                                                                   |
| 4         | (bone adj1 fracture).mp.                                                                                                                                                                                                                                                                        |
| 5         | or/1-4                                                                                                                                                                                                                                                                                          |
| 6         | exp Fentanyl/ or exp Analgesics, Opioid/ or opioid.mp. or exp Analgesics/                                                                                                                                                                                                                       |
| 7         | exp Narcotics/                                                                                                                                                                                                                                                                                  |
| 8         | exp Anti-Inflammatory Agents, Non-Steroidal/                                                                                                                                                                                                                                                    |
| 9         | video.mp. or exp Video-Audio Media/                                                                                                                                                                                                                                                             |
| 10        | exp Music Therapy/ or exp Music/ or music.mp.                                                                                                                                                                                                                                                   |
| 11        | guided imagery.mp. or exp 'Imagery (Psychotherapy)'/                                                                                                                                                                                                                                            |
| 12        | muscle relaxation.mp. or exp Muscle Relaxation/                                                                                                                                                                                                                                                 |
| 13        | breathing exercise.mp. or exp Breathing Exercises/                                                                                                                                                                                                                                              |
| 14        | or/6-13                                                                                                                                                                                                                                                                                         |
| 15        | 5 and 14                                                                                                                                                                                                                                                                                        |
| 16        | Randomized Controlled Trial/                                                                                                                                                                                                                                                                    |
| 17        | Controlled Clinical Trial/                                                                                                                                                                                                                                                                      |
| 18        | (Nonrandom* or non-random* or non-random* or quasi-random* or quasirandom*).ti,ab,hw,kf,kw.                                                                                                                                                                                                     |
| 19        | Control Group/                                                                                                                                                                                                                                                                                  |
| 20        | [(quasiexperimental or quasi-experimental) adj3 (study or studies or trial*)].ti,ab,hw,kf,kw.                                                                                                                                                                                                   |
| 21        | systematic review.mp. or exp 'Systematic Review'/                                                                                                                                                                                                                                               |
| 22        | or/16-21                                                                                                                                                                                                                                                                                        |
| 23        | 15 and 22                                                                                                                                                                                                                                                                                       |
| 24        | limit 23 to (English language and humans)                                                                                                                                                                                                                                                       |
| 25        | (article in press or case report or chapter or comment or conference abstract or conference paper or conference review editorial or letter or note or review or short survey).pt.                                                                                                               |
| 26        | 24 not 25                                                                                                                                                                                                                                                                                       |
